# Supplementary material
Source: MDPI journal article supplement (https://www.mdpi.com/2304-6732/2/3/838)
Supplement: s1 [file s1]

## Effects of Irregular Bimetallic Nanostructures on the Optical Properties of Photosystem I from *Thermosynechococcus elongatus*. *Photonics* 2015, 2, page range

Imran Ashraf <sup>1</sup>, Sepideh Skandary <sup>1</sup>, Mohammad Y. Khaywah <sup>2,3</sup>, Michael Metzger <sup>1</sup>, Alfred J. Meixner <sup>1</sup>, Pierre M. Adam <sup>2</sup> and Marc Brecht <sup>1,4,\*</sup>

<sup>1</sup> IPTC and Lisa+ Center, University of Tübingen, Auf der Morgenstelle 18, 72076 Tübingen, Germany; E-Mails: imran.ashraf@iptc.uni-tuebingen.de (I.A.); sepideh.skandary@uni-tuebingen.de (S.S.); michael.metzger@uni-tuebingen.de (M.M.); alfred.meixner@uni-tuebingen.de (A.J.M.)

<sup>2</sup> Laboratory of Nanotechnology, Instrumentation and Optics, University of Technology of Troyes, 12 Rue Marie Curie, CS 42060, 10004 Troyes Cedex, France; E-Mails: mohammad\_yehia.khaywah@utt.fr (M.Y.K.); pierre\_michel.adam@utt.fr (P.M.A.)

<sup>3</sup> Laboratory of Materials, Catalysis, Environment and Analytical Methods, Lebanese University, Campus Rafic Hariri, Hadath-Beirut, Lebanon

<sup>4</sup> Zurich University of Applied Science Winterthur (ZHAW), Technikumstrasse 13, 8401 Winterthur, Switzerland

\* Author to whom correspondence should be addressed; E-Mail: marc.brecht@uni-tuebingen.de; Tel.: +49-7071-29-76239; Fax: +49-7071-29-5490.

---

### SEM Images and Detail about Particle Size Distributions

The SEM images of the Ag/Au and Au/Au sample are shown in Figure S1a and Figure S2a, respectively. Details about the fabrication of these nanostructures are given in Reference. (Khaywah, *et al.*, 2015). The size of the particles is different in both of the samples. For Ag/Au, the average size of the particles is  $\approx 18$  nm and the standard deviation of the particle's size distribution is 6.4 nm. In total 1339 particles correspondent to the SEM image are measured for Ag/Au sample.

The particle size distribution for Ag/Au sample is given in Figure S1b. The information about the size of the particles of Ag/Au sample is given in Table S1.

Figure S2a shows the SEM image for Au/Au sample where in total 1501 particles are measured. The average size of the particles is  $\approx 19$  nm with standard deviation of 6.1 nm. The size distribution of the particles is demonstrated in Figure S2b. Detailed information about the size of the particles of sample Au/Au is given in Table S2.

(a)

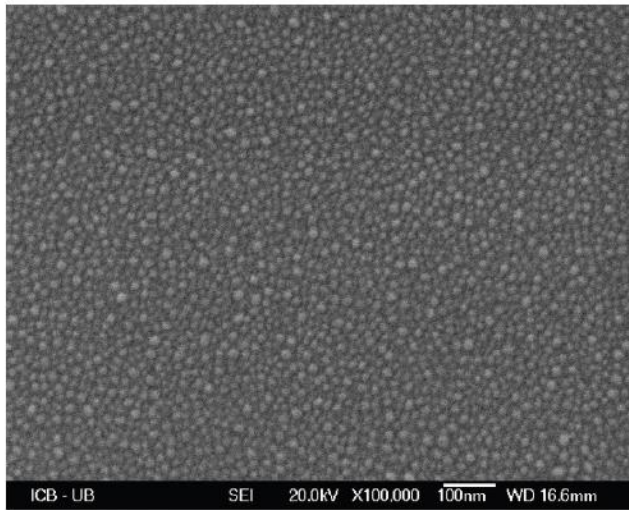

(b)

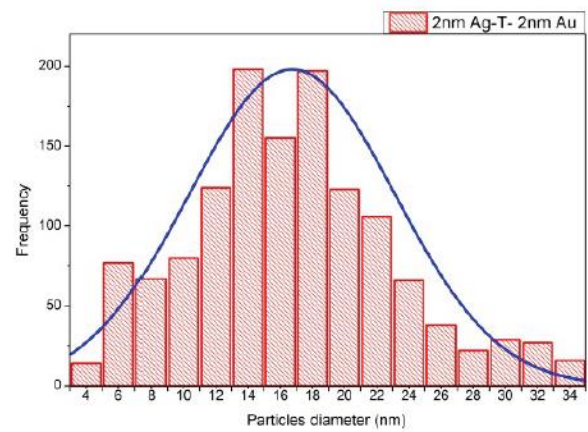

**Figure S1.** (a) SEM image of Ag/Au substrate (b) SEM Image based size distribution of the Ag/Au nanoparticles.

**Table S1.** Particle size distribution of Ag/Au sample.

*Statistics on Columns (7/9/2015 13:13:12)*

|   | N total | Mean     | Standard Deviation | Sum         | Minimum | Median   | Maximum  |
|---|---------|----------|--------------------|-------------|---------|----------|----------|
| A | 1339    | 17.73432 | 6.38481            | 23746.25231 | 5.70563 | 17.37726 | 35.63172 |

(a)

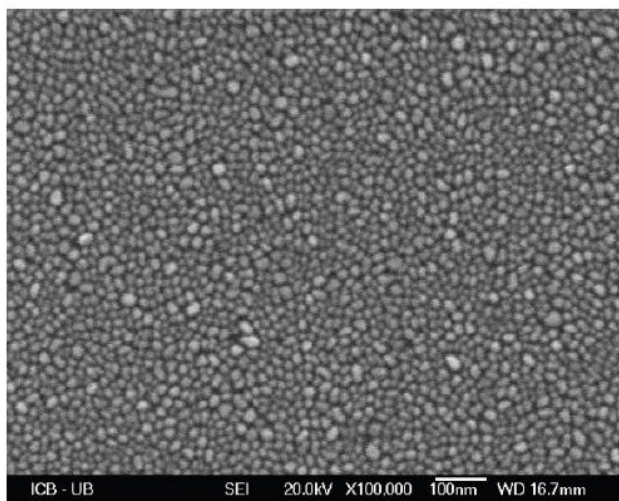

(b)

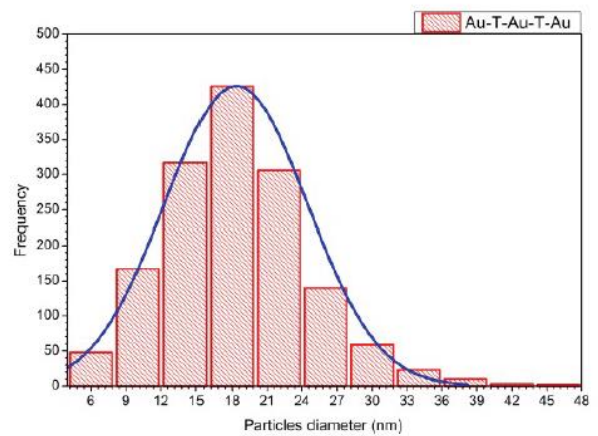

**Figure S2.** (a) SEM image of Au/Au substrate (b) size distribution correspondent to the SEM image of the Au/Au sample.

**Table S2.** Particle size distribution of Au/Au sample.

Statistics on Columns (7/9/2015 13:08:41)

|                          |         |          |                    |             |         |          |          |
|--------------------------|---------|----------|--------------------|-------------|---------|----------|----------|
| + Notes                  |         |          |                    |             |         |          |          |
| + Input Data             |         |          |                    |             |         |          |          |
| - Descriptive Statistics |         |          |                    |             |         |          |          |
|                          | N total | Mean     | Standard Deviation | Sum         | Minimum | Median   | Maximum  |
| F                        | 1501    | 18.37348 | 6.09713            | 27578.59985 | 5.67901 | 18.20454 | 47.12597 |

## Works Cited

Khaywah, M.Y.; Jradi, S.; Louarn, G.; Lacroute, Y.; Toufaily, J.; Hamieh, T.; Adam, P.M. Ultra stable, uniform, reproducible and highly sensitive random arrays of bimetallic nanoparticles as reliable large scale SERS substrates. *J. Phys. Chem. C* **2015**, under review.

© 2015 by the authors; licensee MDPI, Basel, Switzerland. This article is an open access article distributed under the terms and conditions of the Creative Commons Attribution license (<http://creativecommons.org/licenses/by/4.0/>).
